# Supplementary material
Source: PubMed Central journal article supplement (PMC3837502)
Supplement: Supp_Table1-4.pdf [file Supp_Table1-4.pdf]

## Supplementary Data

SUPPLEMENTARY TABLE S1. DEMOGRAPHICS AND BIOCHEMICAL CHARACTERISTICS FOR HIGH TRIGLYCERIDE AT THE 75<sup>TH</sup> PERCENTILE AND LOW HIGH DENSITY LIPOPROTEIN CHOLESTEROL AT THE 25<sup>TH</sup> PERCENTILE IN CASES AND CONTROLS BY GENDER

| Risk determinant                     | Males                   |                              |                |                               |                                    |                | Females                 |                              |                |                               |                                    |                |
|--------------------------------------|-------------------------|------------------------------|----------------|-------------------------------|------------------------------------|----------------|-------------------------|------------------------------|----------------|-------------------------------|------------------------------------|----------------|
|                                      | High<br>TG_75<br>(n=60) | Non-High<br>TG_75<br>(n=110) | P <sup>3</sup> | Low<br>HDL-<br>C_25<br>(n=50) | Non-Low<br>HDL-<br>C_25<br>(n=120) | P <sup>3</sup> | High<br>TG_75<br>(n=33) | Non-High<br>TG_75<br>(n=157) | P <sup>3</sup> | Low<br>HDL-<br>C_25<br>(n=21) | Non-Low<br>HDL-<br>C_25<br>(n=169) | P <sup>3</sup> |
| Age <sup>1</sup>                     | 12.1 (.41)              | 13.1 (.32)                   | 0.021          | 13.0 (0.48)                   | 12.6 (0.31)                        | 0.506          | 12.8 (0.59)             | 13.3 (0.26)                  | 0.791          | 13.4 (0.69)                   | 13.2 (0.26)                        | 0.849          |
| BMI <sup>1</sup>                     | 19.6 (.67)              | 18.4 (.29)                   | 0.423          | 20.1 (0.66)                   | 18.3 (0.32)                        | 0.023          | 20.4 (0.81)             | 18.7 (0.27)                  | 0.080          | 21.5 (0.99)                   | 18.7 (0.27)                        | 0.006          |
| Fasting glucose <sup>1</sup>         | 79. (1.34)              | 78.6 (0.90)                  | 0.396          | 77.0 (1.67)                   | 79.9 (0.80)                        | 0.083          | 74.5 (1.47)             | 75.4 (0.68)                  | 0.590          | 71.8 (2.09)                   | 75.7 (0.63)                        | 0.043          |
| Insulin resistance (IR) <sup>2</sup> | [12 (48)]               | [13 (97)]                    | 0.150*         | [10 (40)]                     | [15 (105)]                         | 0.208*         | [4 (29)]                | [12 (145)]                   | 0.487*         | [1 (20)]                      | [15 (154)]                         | 0.522*         |

High TG\_75 definition=Triglyceride (TG) level  $\geq 75^{\text{th}}$  percentile; Low HDL-C\_25=HDL-C level  $\leq 25^{\text{th}}$  percentile. Age and sex specific percentiles were obtained from National Heart Lung and Blood Institute Growth and Health Study (NGHS) data.

<sup>1</sup>Mean (SE) of risk determinant are presented, unless otherwise indicated.

<sup>2</sup>Insulin Resistance: [IR Cases (IR Controls)], IR Case definition is HOMA-IR  $\geq 3.16$ .

<sup>3</sup>P value presented is Student's *t* test *p* value or Wilcoxon Rank Sum test *p* value where appropriate, unless otherwise indicated.

\*P value presented is from Chi-square test or Fisher's Exact test of association where appropriate.

SUPPLEMENTARY TABLE S2. SINGLE SNP ASSOCIATION ANALYSIS FOR LOW HDL-C AT THE 25<sup>TH</sup> PERCENTILE AND HIGH TG AT THE 75<sup>TH</sup> PERCENTILE

| Gene  | SNP       | Genotype categories | Low HDL-C_25              |                              |                                     | High TG_75                |                              |                                     |
|-------|-----------|---------------------|---------------------------|------------------------------|-------------------------------------|---------------------------|------------------------------|-------------------------------------|
|       |           |                     | Genotype counts cases (%) | Genotype counts controls (%) | P <sup>1</sup> (Allelic, genotypic) | Genotype counts cases (%) | Genotype counts controls (%) | P <sup>1</sup> (Allelic, genotypic) |
| ABCA1 | rs1800977 | CC                  | 33 (46.5)                 | 130 (45.0)                   | (0.995, 0.859)                      | 41 (44.1)                 | 122 (45.7)                   | (0.701, 0.902)                      |
|       |           | CT                  | 31 (43.6)                 | 135 (46.7)                   |                                     | 43 (46.2)                 | 123 (46.1)                   |                                     |
|       |           | TT                  | 7 (9.9)                   | 24 (8.3)                     |                                     | 9 (9.7)                   | 22 (8.2)                     |                                     |
| LPL   | rs328     | SX                  | 14 (19.7)                 | 55 (19.0)                    | (0.901, 0.506)                      | 15 (16.1)                 | 54 (20.2)                    | (0.414, 0.446)                      |
|       |           | SS                  | 57 (80.3)                 | 234 (81.0)                   |                                     | 78 (83.9)                 | 213 (79.8)                   |                                     |
| CETP  | rs708272  | B1B1                | 30 (42.2)                 | 78 (27.0)                    | (0.005, 0.019)                      | 28 (30.1)                 | 80 (30.0)                    | (0.765, 0.842)                      |
|       |           | B1B2                | 32 (45.1)                 | 142 (49.1)                   |                                     | 43 (46.2)                 | 131 (49.1)                   |                                     |
|       |           | B2B2                | 9 (12.7)                  | 69 (23.9)                    |                                     | 22 (23.7)                 | 56 (20.9)                    |                                     |
| LIPC  | rs1800588 | CC                  | 42 (59.2)                 | 202 (70.0)                   | (0.09, 0.184)                       | 63 (67.7)                 | 181 (67.8)                   | (0.790, 0.665)                      |
|       |           | CT                  | 26 (36.6)                 | 79 (27.3)                    |                                     | 26 (28.0)                 | 79 (29.6)                    |                                     |
|       |           | TT                  | 3 (4.2)                   | 8 (2.7)                      |                                     | 4 (4.3)                   | 7 (2.6)                      |                                     |
| SHBG  | rs1799941 | AA                  | 0 (0.0)                   | 8 (2.7)                      | (0.240, 0.449)                      | 2 (2.2)                   | 6 (2.3)                      | (0.783, 0.965)                      |
|       |           | AG                  | 17 (23.9)                 | 76 (26.3)                    |                                     | 23 (24.7)                 | 70 (26.2)                    |                                     |
|       |           | GG                  | 54 (76.1)                 | 205 (71.0)                   |                                     | 68 (73.1)                 | 191 (71.5)                   |                                     |
|       | rs6257    | CC                  | 1 (1.4)                   | 3 (1.0)                      | (0.088, 0.111)                      | 3 (3.2)                   | 1 (0.4)                      | (0.966, 0.067)                      |
|       |           | CT                  | 30 (42.3)                 | 89 (30.8)                    |                                     | 27 (29.0)                 | 92 (34.5)                    |                                     |
|       |           | TT                  | 40 (56.3)                 | 197 (68.2)                   |                                     | 63 (67.8)                 | 174 (65.1)                   |                                     |

<sup>1</sup>Chi-Square or Fisher's Exact test *p* value is presented where appropriate for indicated test, either allelic or genotypic.

<sup>2</sup>Allelic test: Compares the frequencies of alleles at the specified marker in cases versus controls using a Chi-Square test with 1 degree of freedom; *M* versus *m* (*M*=major allele, *m*=minor allele).

<sup>3</sup>Genotypic test: Compares the frequencies of genotypes at a specified marker in cases versus controls using a Chi-Square test with 2 degrees of freedom; *MM* versus *Mm* versus *mm* (*M*=major allele, *m*=minor allele).

SUPPLEMENTARY TABLE S3. PREVALENCE BASED ASSOCIATION TEST (PRAT) RESULTS FOR SINGLE VARIANT ASSOCIATION BETWEEN GENOTYPED SNPs AND LOW HDL-C AT THE 25<sup>TH</sup> PERCENTILE AND HIGH TG AT THE 75<sup>TH</sup> PERCENTILE

| <i>Gene</i> | <i>SNP</i> | <i>Low HDL-C_25</i>              |                                     | <i>High TG_75</i>                |                                     |
|-------------|------------|----------------------------------|-------------------------------------|----------------------------------|-------------------------------------|
|             |            | <i>PRAT P cases</i> <sup>1</sup> | <i>PRAT P controls</i> <sup>2</sup> | <i>PRAT P cases</i> <sup>1</sup> | <i>PRAT P controls</i> <sup>2</sup> |
| ABCA1       | rs1800977  | 1.000                            | 0.411                               | 0.828                            | 0.502                               |
| LPL         | rs328      | 0.687                            | 0.621                               | 0.789                            | 0.247                               |
| CETP        | rs708272   | 0.022                            | 0.014                               | 0.675                            | 0.942                               |
| LIPC        | rs1800588  | 0.255                            | 0.167                               | 0.751                            | 0.651                               |
| SHBG        | rs1799941  | 0.327                            | 0.333                               | 0.968                            | 0.940                               |
|             | rs6257     | 0.060                            | 0.784                               | 1.000                            | 0.032                               |

<sup>1</sup>PRAT *p* value from case only analysis in selected phenotype, *p* value presented is permutation based pvalue (*n* = 1000).

<sup>2</sup>PRAT *p* value from control only analysis in selected phenotype, *p* value presented is permutaiton based pvalue (*n* = 1000).

SUPPLEMENTARY TABLE S4. LOGISTIC REGRESSION RESULTS FOR LOW HDL-C AT 25<sup>TH</sup> PERCENTILE AND HIGH TG AT THE 75<sup>TH</sup> PERCENTILE AMONG GIRLS AND BOYS

| Gene  | SNP       | Low HDL-C_25    |                         |                |                 |                         |                | High TG_75      |                         |                |                 |                         |                |
|-------|-----------|-----------------|-------------------------|----------------|-----------------|-------------------------|----------------|-----------------|-------------------------|----------------|-----------------|-------------------------|----------------|
|       |           | Males           |                         |                | Females         |                         |                | Males           |                         |                | Females         |                         |                |
|       |           | OR <sup>1</sup> | 95% Confidence interval | P <sup>2</sup> | OR <sup>1</sup> | 95% Confidence interval | P <sup>2</sup> | OR <sup>1</sup> | 95% Confidence interval | P <sup>2</sup> | OR <sup>1</sup> | 95% Confidence interval | P <sup>2</sup> |
| ABCA1 | rs1800977 | 0.84            | 0.50–1.41               | 0.51           | 0.99            | 0.44–2.23               | 0.98           | 0.86            | 0.51–1.43               | 0.56           | 1.02            | 0.52–2.00               | 0.95           |
| LPL   | rs328     | 1.54            | 0.66–3.62               | 0.32           | 0.56            | 0.14–2.18               | 0.40           | 0.36            | 0.13–1.00               | 0.05           | 1.49            | 0.60–3.73               | 0.39           |
| CETP  | rs708272  | 0.62            | 0.37–1.02               | 0.06           | 0.39            | 0.18–0.84               | 0.02           | 1.12            | 0.70–1.81               | 0.63           | 0.95            | 0.55–1.63               | 0.84           |
| LIPC  | rs1800588 | 1.56            | 0.85–2.85               | 0.15           | 1.44            | 0.58–3.58               | 0.44           | 0.87            | 0.46–1.64               | 0.66           | 1.10            | 0.53–2.29               | 0.80           |
| SHBG  | rs1799941 | 1.71            | 0.77–3.79               | 0.19           | 0.93            | 0.36–2.39               | 0.88           | 0.78            | 0.39–1.57               | 0.49           | 1.26            | 0.57–2.77               | 0.57           |
|       | rs6257    | 0.54            | 0.28–1.06               | 0.07           | 0.65            | 0.26–1.61               | 0.35           | 0.68            | 0.35–1.33               | 0.26           | 1.67            | 0.71–3.89               | 0.24           |

All analyses were adjusted for age, BMI, and HOMA-IR measurements.

\*Logistic regression models tested were coded additively using three independent genotype categories for each marker, with the homozygous major genotype group as the reference. Genotype group categorizes were as follows; homozygous major=0, heterozygote=1, homozygous minor=2. OR presented above represent the change in odds per each 1 unit change in genotype group.

<sup>1</sup>OR=Odds ratio; <sup>2</sup>P value presented is from adjusted logistic regression analysis for association with the specified phenotype.
