# Supplementary material
Source: PubMed Central journal article supplement (PMC3837502)
Supplement: Supp_Table1.pdf [file Supp_Table1.pdf]

## Supplementary Data

SUPPLEMENTARY TABLE S1. DEMOGRAPHICS AND BIOCHEMICAL CHARACTERISTICS FOR HIGH TRIGLYCERIDE AT THE 75<sup>TH</sup> PERCENTILE AND LOW HIGH DENSITY LIPOPROTEIN CHOLESTEROL AT THE 25<sup>TH</sup> PERCENTILE IN CASES AND CONTROLS BY GENDER

| Risk determinant                     | Males                |                           |                |                        |                             |                | Females              |                           |                |                        |                             |                |
|--------------------------------------|----------------------|---------------------------|----------------|------------------------|-----------------------------|----------------|----------------------|---------------------------|----------------|------------------------|-----------------------------|----------------|
|                                      | High TG_75<br>(n=60) | Non-High TG_75<br>(n=110) | P <sup>3</sup> | Low HDL-C_25<br>(n=50) | Non-Low HDL-C_25<br>(n=120) | P <sup>3</sup> | High TG_75<br>(n=33) | Non-High TG_75<br>(n=157) | P <sup>3</sup> | Low HDL-C_25<br>(n=21) | Non-Low HDL-C_25<br>(n=169) | P <sup>3</sup> |
| Age <sup>1</sup>                     | 12.1 (.41)           | 13.1 (.32)                | 0.021          | 13.0 (0.48)            | 12.6 (0.31)                 | 0.506          | 12.8 (0.59)          | 13.3 (0.26)               | 0.791          | 13.4 (0.69)            | 13.2 (0.26)                 | 0.849          |
| BMI <sup>1</sup>                     | 19.6 (.67)           | 18.4 (.29)                | 0.423          | 20.1 (0.66)            | 18.3 (0.32)                 | 0.023          | 20.4 (0.81)          | 18.7 (0.27)               | 0.080          | 21.5 (0.99)            | 18.7 (0.27)                 | 0.006          |
| Fasting glucose <sup>1</sup>         | 79. (1.34)           | 78.6 (0.90)               | 0.396          | 77.0 (1.67)            | 79.9 (0.80)                 | 0.083          | 74.5 (1.47)          | 75.4 (0.68)               | 0.590          | 71.8 (2.09)            | 75.7 (0.63)                 | 0.043          |
| Insulin resistance (IR) <sup>2</sup> | [12 (48)]            | [13 (97)]                 | 0.150*         | [10 (40)]              | [15 (105)]                  | 0.208*         | [4 (29)]             | [12 (145)]                | 0.487*         | [1 (20)]               | [15 (154)]                  | 0.522*         |

High TG\_75 definition=Triglyceride (TG) level  $\geq 75^{\text{th}}$  percentile; Low HDL-C\_25=HDL-C level  $\leq 25^{\text{th}}$  percentile. Age and sex specific percentiles were obtained from National Heart Lung and Blood Institute Growth and Health Study (NGHS) data.

<sup>1</sup>Mean (SE) of risk determinant are presented, unless otherwise indicated.

<sup>2</sup>Insulin Resistance: [IR Cases (IR Controls)], IR Case definition is HOMA-IR  $\geq 3.16$ .

<sup>3</sup>P value presented is Student's *t* test *p* value or Wilcoxon Rank Sum test *p* value where appropriate, unless otherwise indicated.

\*P value presented is from Chi-square test or Fisher's Exact test of association where appropriate.
